# Supplementary material
Source: MDPI journal article supplement (https://www.mdpi.com/2073-4433/7/8/108)
Supplement: s1 [file s1]

# Supplementary Materials: Evaluating Summer-Time Ozone Enhancement Events in the Southeast United States. *Atmosphere* 2016, 7, 108

Matthew S. Johnson, Shi Kuang, Lihua Wang and M. J. Newchurch

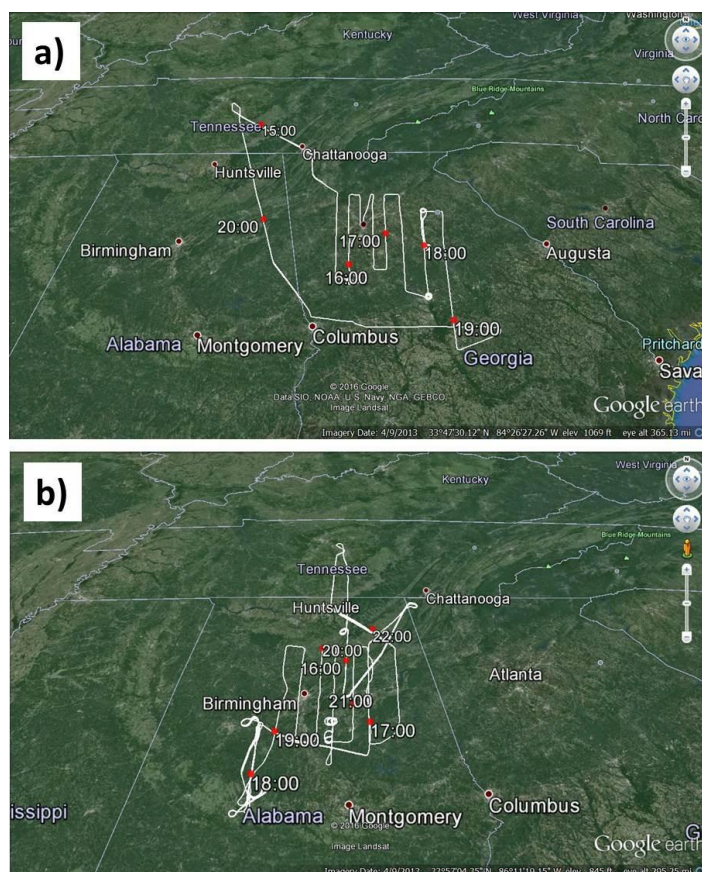

**Figure S1.** Flight tracks of NOAA P3 measurements during the SENEX field campaign on (a) 12 June 2013 and (b) 29 June 2013 overlaid on Google Earth.

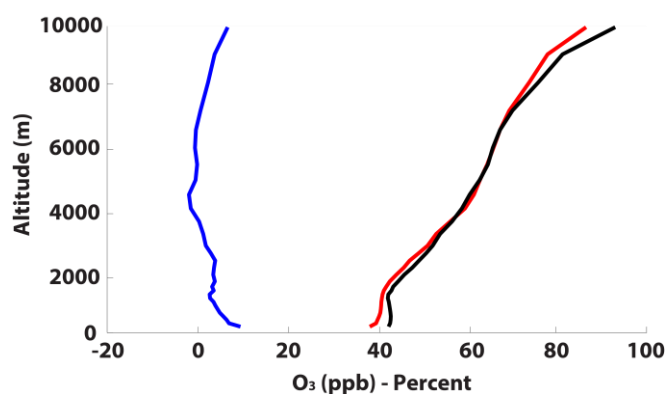

**Figure S2.** GEOS-Chem-predicted monthly-averaged  $O_3$  (black line,  $\text{nmol}\cdot\text{mol}^{-1}$ ), summation of source attributed  $O_3$  (red line,  $\text{nmol}\cdot\text{mol}^{-1}$ ), and the percent difference between baseline and summation of source attributed  $O_3$  (blue line, %) over the UAH TOLNet site during June 2013.

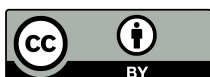

© 2016 by the authors; licensee MDPI, Basel, Switzerland. This article is an open access article distributed under the terms and conditions of the Creative Commons by Attribution (CC-BY) license (<http://creativecommons.org/licenses/by/4.0/>).
